# Supplementary material for: Feasibility of Vital Signs Assessment by Community Health Workers during Antenatal Care Community Outreach in Lusaka, Zambia: A Qualitative Study
Source: Research Square preprint supplement (doi:10.21203/rs.3.rs-6398306/v1), 2025-05-15
Supplement: Supplementary file 1 [file 114afe1804341e85a3692513.docx]

**IN-DEPTH INTERVIEW GUIDE**

**TARGET AUDIENCE:** Community Health Workers

| **Instructions:** |
| --- |
| This is an in-depth interview guide. Please use the questions outlined below to guide your discussion with the participant. Do not repeat a question if it has been answered in the participants’ explanation. Remember to probe for any additional thoughts on what the participant has said. |
| **Introduction**:  Hello. My name is [____] from CIDRZ. Thank you for agreeing to an interview today. We are interested to hear about your experience using the NeoSpot device to measure pregnant women’s vital signs during community antenatal outreach activities under the study “Feasibility of Vital Sign Assessment by Community Health Workers during Antenatal Care Community Outreach”. I want to remind you that your identity and the information you share are confidential. What you share will not be connected back to you. Please feel free to express yourself, as there are no 'right' or 'wrong' answers. Some questions may be sensitive or things you do not wish to discuss. If this happens, you are free to skip any question you do not want to answer or stop the interview. Please feel free to ask me any questions if something is unclear. With your permission, we will record this interview. |
| **[IF AGREEABLE, TURN ON THE RECORDER NOW]** |
|  |
| This is [NAME] beginning this **in-depth interview with a community health worker** on [dd/mm/yyyy] at [hh:mm] |

**SECTION 1: INTRODUCTION**

*[The warm-up question is to understand the participants' context and build rapport for the discussion]*

1. Before we start the discussion, can you please tell me about your work as a community health worker?

Probe:

- What type of services do you provide in your healthcare facility?
- What do you enjoy about this work?

**SECTION 2: PAST EXPERIENCE WITH VITAL SIGN ASSESSMENT**

*[In this section, I will ask you about your experience with monitoring vital signs of pregnant women at either the healthcare facility or during community ANC reach. By ‘vital signs’, I am referring to their body temperature, heart rate, respiratory rate, oxygen saturation and blood pressure]*

1. Before this study, can you describe how you measured a pregnant woman’s vital signs at the health care facility or during community ANC outreach?
2. How long did it take before you shared the vital sign results with the pregnant woman?
3. What happened after you shared the vital sign results?
4. From your perspective as a community health worker, how do you think manually measuring vital signs affects the care you provide?

Probe:

- (Long waiting times, shortage of / lack of medical supplies, patient-centred care)

**SECTION 3: EXPERIENCE WITH NEOSPOT**

[*We are now going to discuss your experience with measuring vital signs using the NeoSpot device during community ANC outreach. By vital signs, I am referring to their body temperature, heart rate, respiratory rate, oxygen saturation and blood pressure]*

1. Please can you tell me about the time when you first heard about the NeoSpot device?

Probe:

- From what source?
- What did they say about the NeoSpot device?

1. What were your initial thoughts when you first heard about it?

Probe:

- Why did you think that?

1. Can you describe what happened when you first introduced the NeoSpot device to a pregnant woman?
2. Can you describe how pregnant women reacted to the NeoSpot device when they first wore it?

Probe:

- Why do you think they reacted the way they did?

1. How long did it take before you shared the vital sign results with the pregnant woman after using the NeoSpot device?
2. How did the pregnant women react when you shared the vital sign results?

Probe:

- (Relieved, disbelief, angry, scared, happy)

1. What helped the pregnant woman understand what the NeoSpot device results were showing?
2. Can you share the common questions or concerns pregnant women ask when measuring their vital signs using the NeoSpot device?
3. What elements of the NeoSpot device made pregnant women feel positive about it?

Probe:

- Why do you think this is the case?

1. What elements of the NeoSpot device made pregnant women feel negative about it?

Probe:

- Why do you think this is the case?

1. Please tell me about your overall thoughts or feelings about using the NeoSpot device for vital sign assessment among pregnant women during community ANC outreach?
2. What aspects of the NeoSpot device did you like the most?
3. What aspects of the NeoSpot did you like the least?
4. How did your experience match your expectations of the NeoSpot device?

Probe:

- (Appearance, time spent, size, ease of use)

1. In your opinion, how did you think the NeoSpot device changed your ability to carry out vital sign assessments during community ANC outreach?

Probe:

- (Time-saving procedures)

**SECTION 4: CLOSING**

*[We have now come to the last part of the interview]*

1. Having experienced the NeoSpot device, do you think it is a better approach to measuring the vital signs of pregnant women during community ANC outreach?
2. Why do you say so?
3. How do you think the NeoSpot device can be easily integrated into routine community ANC outreach?
4. What additional information do you think pregnant women need about the NeoSpot device?
5. How do you think this information would impact the use of the NeoSpot device?
6. If given a choice of selecting how to measure vital signs among pregnant women during community ANC outreach, how would you decide on whether to do it manually or use the NeoSpot device?
7. In your opinion, how can the NeoSpot device be improved to be effective in vital sign assessment during community ANC outreach?
8. Why do you say so?

Probe:

- (Appearance, size, quality)

1. Which other areas do you feel the NeoSpot device can be helpful?
2. Is there anything else you would like to share with us that you feel I have not addressed?
