# Supplementary material for: Feasibility of Vital Signs Assessment by Community Health Workers during Antenatal Care Community Outreach in Lusaka, Zambia: A Qualitative Study
Source: Research Square preprint supplement (doi:10.21203/rs.3.rs-6398306/v1), 2025-05-15
Supplement: Supplementary file 2 [file 2fa9d7cbdab09cbcf93d6bf4.docx]

**IN-DEPTH INTERVIEW GUIDE**

**TARGET AUDIENCE:** Pregnant Women

| **Instructions:** |
| --- |
| This is an indepth interview guide. Please use the questions outlined below to guide your discussion with the participant. Do not repeat a question if it has been answered in the participants’ explanation. Remember to probe for any additional thoughts on what the participant has said. |
| **Introduction**:  Hello. My name is [____] from CIDRZ. Thank you for agreeing to an interview today. We are interested to hear about your experience with using the NeoSpot device to measure your vital signs during the routine government community antenatal outreach activities under the study called “Feasibility of Vital Sign Assessment by Community Health Workers during Antenatal Care Community Outreach”. I want to remind you that your identity and the information you share is confidential. What you share will not be connected back to you. Please feel free to express yourself as there are no ‘right’ or ‘wrong’ answers. Some questions may be sensitive or simply things you do not wish to talk about. If this happens you are free to skip any question you do not want to answer or stop the interview. Please feel free to ask me any questions if something is unclear. With your permission, we will record this interview. |
| **[IF AGREEABLE, TURN ON RECORDER NOW]** |
|  |
| This is [NAME] beginning this **indepth interview with a pregnant** **woman** on [dd/mm/yyyy] at [hh:mm] |

**SECTION 1: INTRODUCTION**

*[The warm-up question is to understand participants personal context and build rapport for the discussion]*

1. Before we start the discussion, can you please tell me about yourself and your family?

Probe:

- Who lives in your household with you?
- How many times have you been pregnant?

**SECTION 2: PAST EXPERIENCE WITH VITAL SIGN CHECKS**

*[In this section I will ask you about your experience with getting your vital signs checked by a healthcare provider at a health care facility or during community antenatal care (ANC) outreach. By ‘vital signs’ I am referring to your body temperature, heart rate, respiratory rate, oxygen saturation and blood pressure]*

1. Before this study, can you describe what happened the last time you had your vital signs checked at a health care facility or during community ANC outreach?
2. How did you find the experience of having your vital signs checked at the health care facility or during community ANC outreach?
3. How long did you wait before you received your vital sign results?
4. What happened after you received your vital sign results?
5. How did you feel about the care you received by the healthcare provider?
6. What challenges if any, did you face when having your vital signs checked at the healthcare facility or community ANC outreach?

Probe:

- (Long waiting times, power outages, shortage of / lack of medical supplies, poor healthcare provider treatment)

**SECTION 3: EXPERIENCE WITH NEOSPOT**

[*Now, we are going to discuss your experience with getting your vital signs checked using the NeoSpot device during community ANC outreach. By vital signs I am referring to your body temperature, heart rate, respiratory rate, oxygen saturation and blood pressure]*

1. Please can you tell me about the time when you first heard about the NeoSpot device?

Probe:

- From what source?
- What did they say about the NeoSpot device?

1. What were your initial thoughts when you first heard about it?

Probe:

- Why did you think that?

1. Now can you describe what happened when you attended community ANC outreach and had your vital signs checked using the NeoSpot device?
2. What made you decide to get screened using the NeoSpot device?
3. How did you feel before wearing the NeoSpot device?

Probe:

- (Scared, anxious, angry, excited)

1. Why did you feel that way?
2. How long did you wait before you received your vital sign results using the NeoSpot device?
3. How did you feel the moment you received them?

Probe:

- (Relieved, sad, angry, scared, happy)

1. What helped you understand what the NeoSpot device result was showing?
2. What happened after you received your vital sign results?
3. How did your experience match your expectations of the NeoSpot device?

Probe:

- (Appearance, time spent, size, procedures)

1. Please tell me about your overall thoughts or feelings about using the NeoSpot device to check for vital signs during community ANC outreach?
2. What aspects of the NeoSpot device did you like the most?
3. What aspects of the NeoSpot did you like the least?
4. How would your family and friends react if you told them about the NeoSpot device?
5. Would you recommend the NeoSpot to someone you care about?
6. In your opinion, what are the significant differences between having your vital signs manually checked by a healthcare provider in comparison to using the NeoSpot device?

Probe:

- (Time saving, procedures,)

**SECTION 4: CLOSING**

*[We have now come to the last part of the interview]*

1. Having experienced screening through the NeoSpot device during community ANC outreach, would you do it again given a chance?
2. Why do you say so?
3. If given a choice of selecting how your vital signs should be checked during community ANC outreach, how would you decide on which one to choose between a manual check by a healthcare provider or the NeoSpot device?
4. How can the NeoSpot device be improved to be effective in checking vital signs during community ANC outreach?
5. What do you think could be improved about the NeoSpot device?
6. Which other areas do you feel the NeoSpot device can be useful in?
7. Is there anything else you would like to share with us that you feel I have not addressed?
